# Supplementary material for: Feather-Like Gold Nanostructures Anchored onto 3D-Mesoporous Laser-Scribed Graphene: A Highly Sensitive Platform for Enzymeless Glucose Electrochemical Detection in Neutral Media
Source: Preprints.org preprint supplement (doi:10.20944/preprints202305.2000.v1), 2023-05-29
Supplement: Supplementary file 1 [file supplementary]

Supplementary Materials

# Feather-Like Gold Nanostructures Anchored onto 3D-Mesoporous Laser-Scribed Graphene: A Highly Sensitive Platform for Enzymeless Glucose Electrochemical Detection in Neutral Media

Achraf Berni<sup>1,2</sup>, Juan José García-Guzmán<sup>2</sup>, Laura Cubillana-Aguilera<sup>2</sup>, José María Palacios-Santander<sup>2</sup> and Aziz Amine<sup>1\*</sup>

<sup>1</sup> Laboratory of Process Engineering and Environment, Faculty of Sciences and Techniques, Hassan II University of Casablanca, P.A. 149, Mohammedia 28810, Morocco

<sup>2</sup> Department of Analytical Chemistry, Institute of Research on Electron Microscopy and Materials (IMEYMAT), Faculty of Sciences, Campus de Excelencia Internacional del Mar (CEIMAR), University of Cadiz, Campus Universitario de Puerto Real, Polígono del Río San Pedro S/N, 11510 Puerto Real, Cádiz, Spain

\* Correspondence: aziz.amine@fstm.ac.ma

**Keywords:** Non-enzymatic Detection; Laser-scribed Graphene; Gold Nanostructures; Neutral medium; Disposable sensor; Glucose sensor.

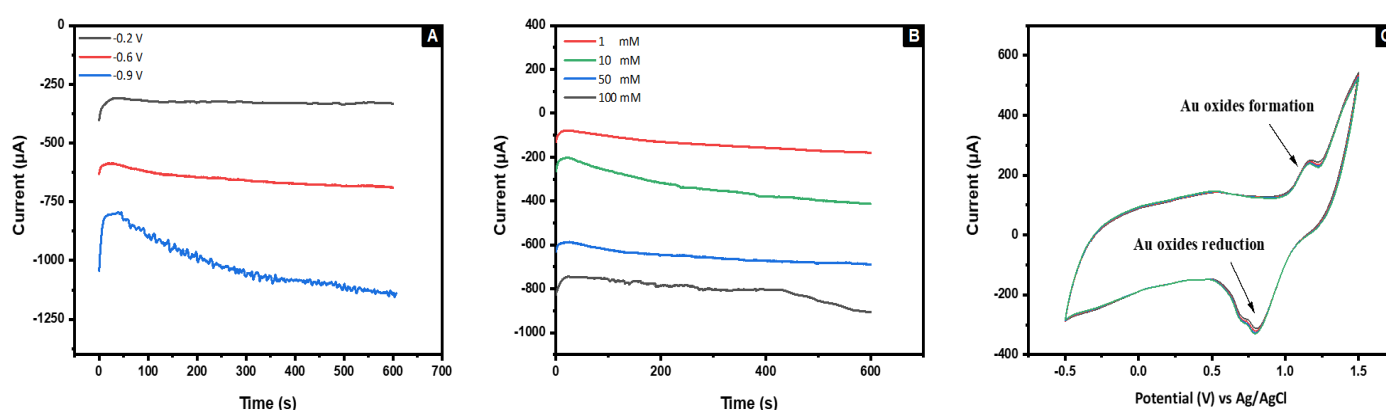

**Figure S1.** electrodeposition chronoamperograms of AuNs (A) at different potentials -0.2, -0.6, -0.9V vs. Ag/AgCl (3M KCl) for 600 s in a 0.5M H<sub>2</sub>SO<sub>4</sub>, (B) at different gold precursor concentration 1, 10, 50 and 100mM (B) five successive scans, related to the polarization of AuNs-LSGE performed by CVs in 0.5 M H<sub>2</sub>SO<sub>4</sub> solution, scan rate 100 mV s<sup>-1</sup>.

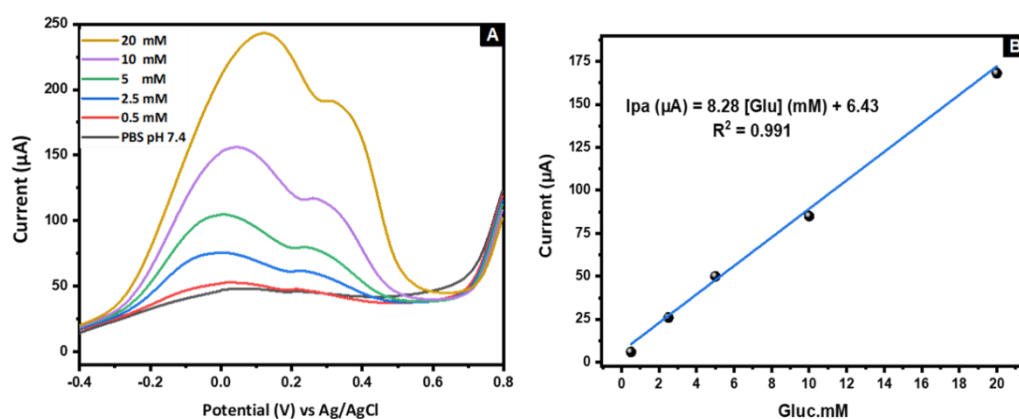

**Figure S2.** (A) LSV of glucose with different concentrations (0.5, 2.5, 5, 10, 20) at AuNs-LSGE in 0.1M PBS pH 7.4, scan rate; 50mV.s<sup>-1</sup> (B) The corresponding calibration curve.

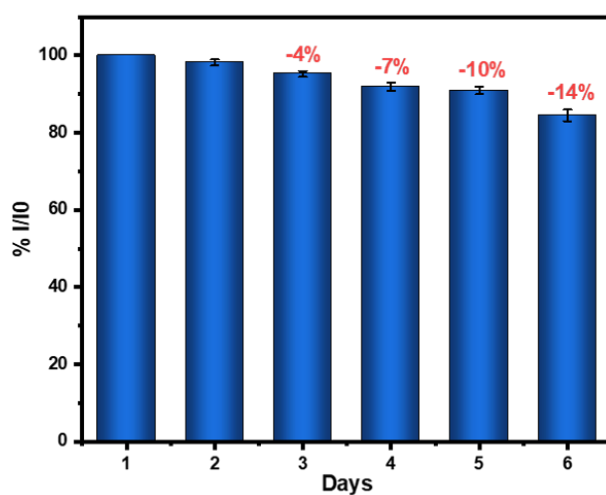

**Figure S3.** Current response % of 5mM glucose over days recorded from I vs time (s)
